# Supplementary material for: Antioxidative Activity of Soy, Wheat and Pea Protein Isolates Characterized by Multi-Enzyme Hydrolysis
Source: MDPI journal article supplement (doi:10.3390/nano11061509), 2021-06-07
Supplement: s1 [file s1]

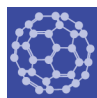

## Article

# Antioxidative Activity of Soy, Wheat and Pea Protein Isolates Characterized by Multi-Enzyme Hydrolysis

Chiung-Yueh Chang <sup>1</sup>, Jinn-Der Jin <sup>2</sup>, Hsiao-Li Chang <sup>2</sup>, Ko-Chieh Huang <sup>1</sup>, Yi-Fen Chiang <sup>1</sup>, Mohamed Ali <sup>3</sup> and Shih-Min Hsia <sup>1,4,5,6,\*</sup>

<sup>1</sup> School of Nutrition and Health Sciences, College of Nutrition, Taipei Medical University, Taipei 110, Taiwan; d507104001@tmu.edu.tw (C.-Y.C.); a910241@gmail.com (K.-C.H.); yvonne840828@gmail.com (Y.-F.C.); bryanhsia@tmu.edu.tw (S.-M.H)

<sup>2</sup> GeneFerm Biotechnology Co., Ltd., Tainan 741, Taiwan; jin168@geneferm.com (J.-D.J); gracechang@geneferm.com (H.-L.C)

<sup>3</sup> Clinical Pharmacy Department, Faculty of Pharmacy, Ain Shams University, Cairo 11566, Egypt; mohamed.aboouf@pharma.asu.edu.eg

<sup>4</sup> Graduate Institute of Metabolism and Obesity Sciences, College of Nutrition, Taipei Medical University, Taipei 110, Taiwan

<sup>5</sup> School of Food and Safety, Taipei Medical University, Taipei 110, Taiwan

<sup>6</sup> Nutrition Research Center, Taipei Medical University Hospital, Taipei 110, Taiwan

\* Correspondence: bryanhsia@tmu.edu.tw; Tel.: +886-2-2736-1661

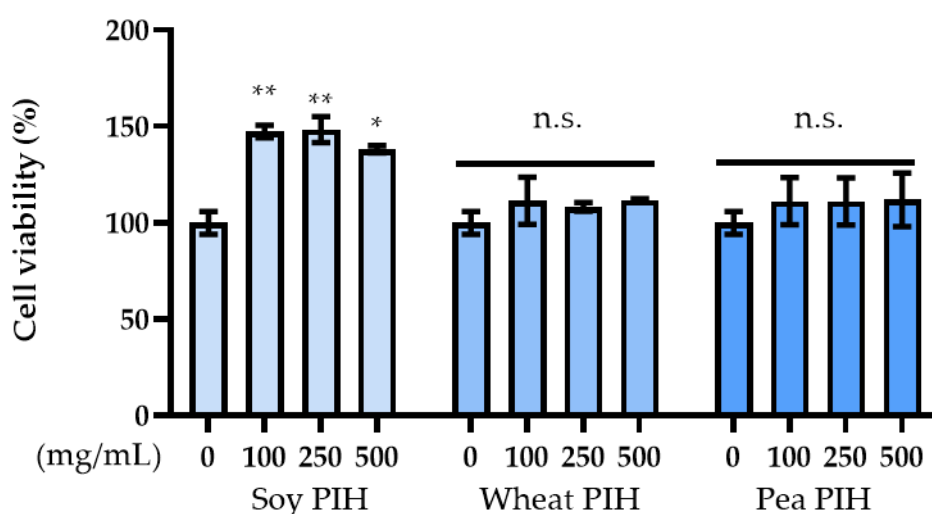

**Figure S1.** Toxicity effect of PIH on C2C12. C2C12 myoblasts ( $1 \times 10^4$  cells) were cultured in 96-well plates using 2% horse serum DMEM to differentiate the myotubes. After 6 days of differentiation, the samples were treated with different dosages of plant PIH for 24 hours \*  $p < 0.05$ ; \*\*,  $p < 0.01$  versus 0 mg/mL cells. PIH: protein isolate hydrolysate.
